# Supplementary material
Source: publisher figshare collection journal article supplement (https://karger.figshare.com/articles/dataset/_/20400753)
Supplement: Supplementary file 1 [file 1]

Supplement Figure S1. Flow chart of subjects included in analysis from the CHIMES Study.

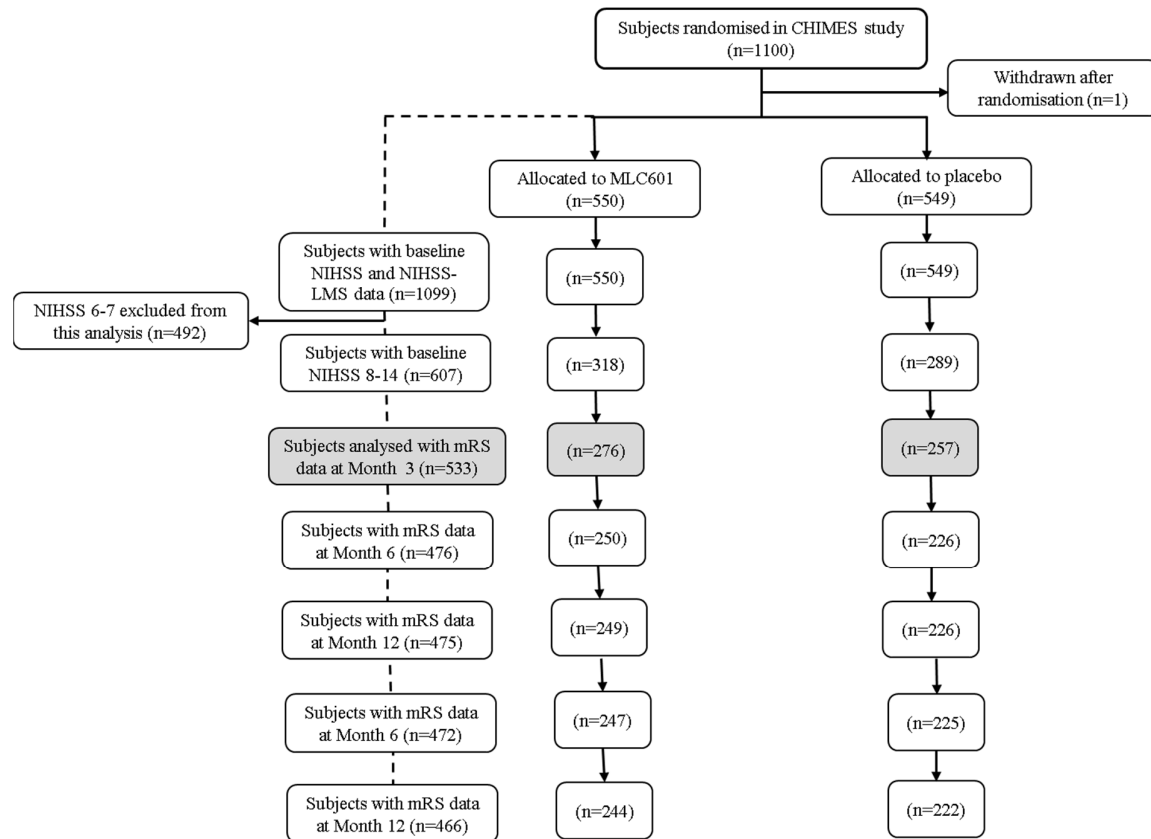

NIHSS : NIH Stroke Scale ; NIHSS-LMS : NIHSS limb motor score ; mRS : modified Rankin Score ; n : number
