# Supplementary material
Source: publisher figshare collection journal article supplement (https://karger.figshare.com/articles/dataset/_/20400753)
Supplement: Supplementary file 2 [file 1]

Supplement Figure S2. Analysis for favourable outcome (mRS = 0-1) at 3 months to define best cut-off value based on the baseline NIHSS limb motor score (b-NIHSS-LMS).

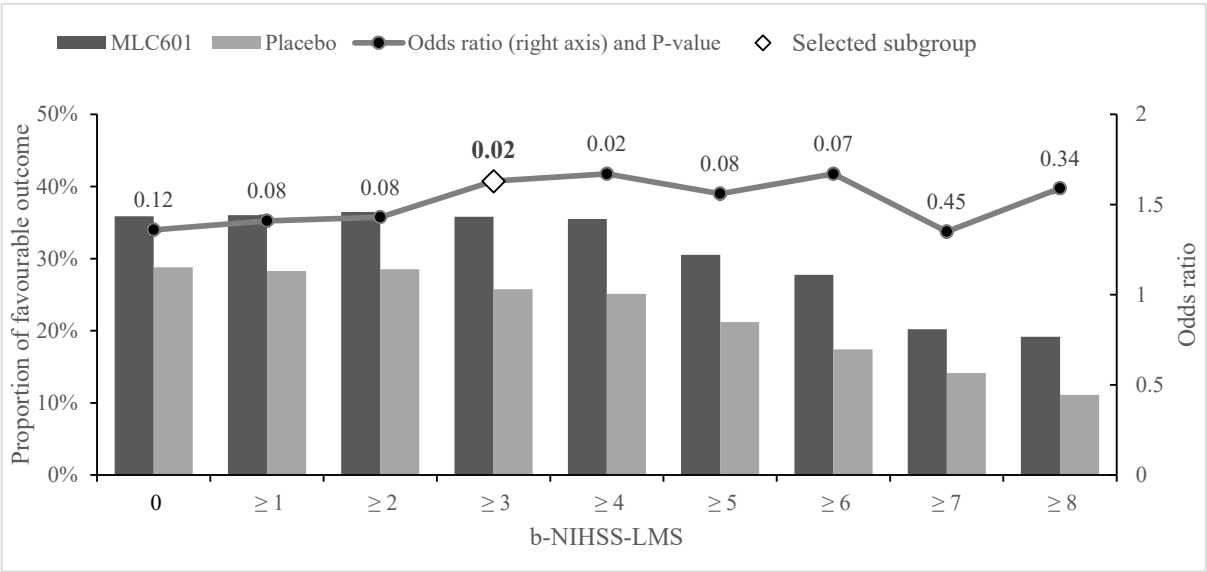

b-NIHSS-LMS : baseline NIH Stroke Scale limb motor score
